# Supplementary material for: A highly selective AIEgen fluorescent probe for visualizing Cys in living cells andC. elegans
Source: Royal Society of Chemistry journal article supplement (doi:10.1039/d1nj03701c), 2021-01-01
Supplement: d1nj03701c1.pdf [file d1nj03701c1.pdf]

## Supporting Information

A highly selective AIEgen fluorescent probe for visualizing Cys in living cells and *C. elegans*

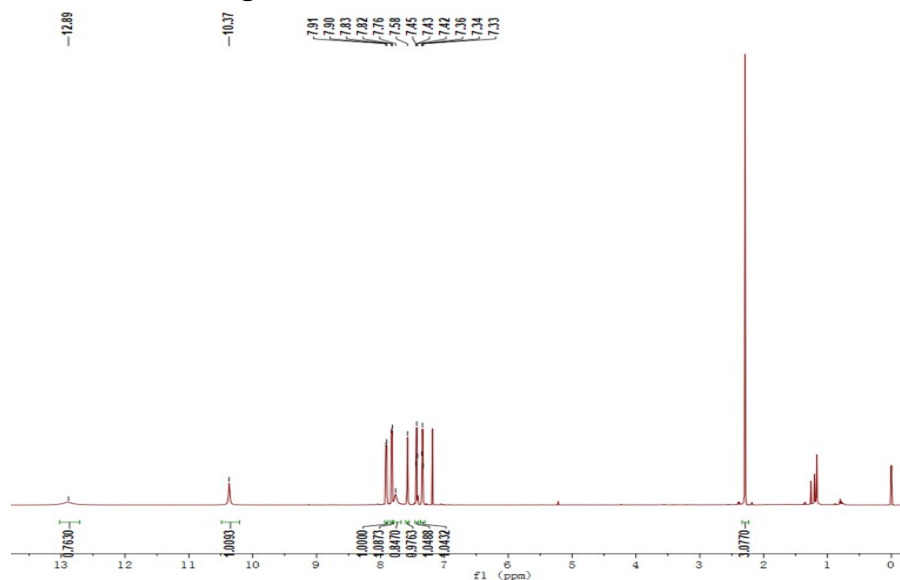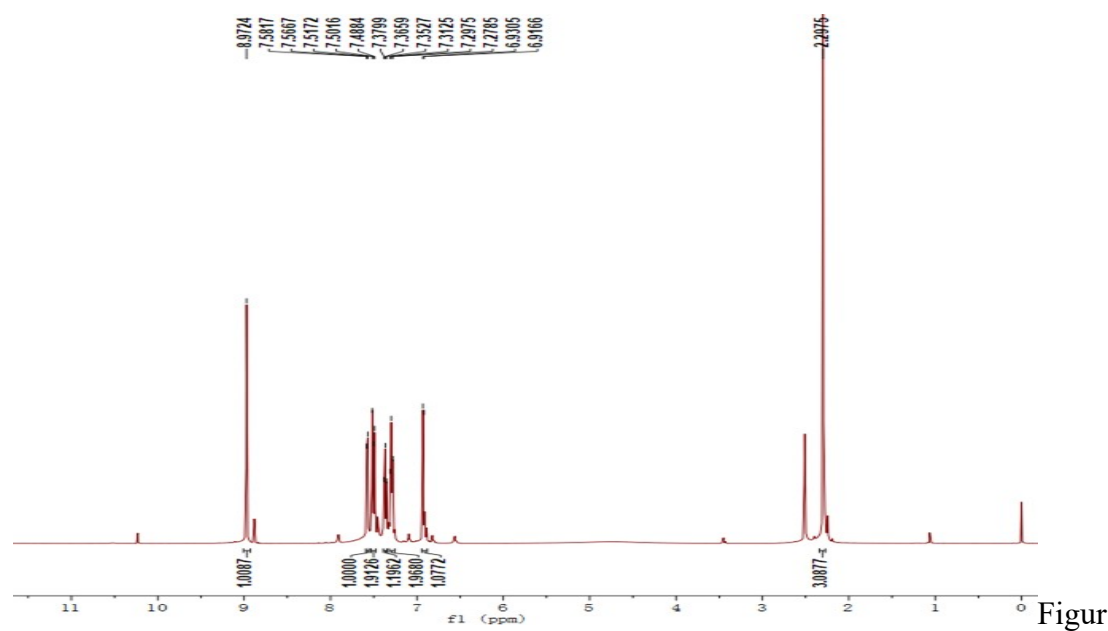

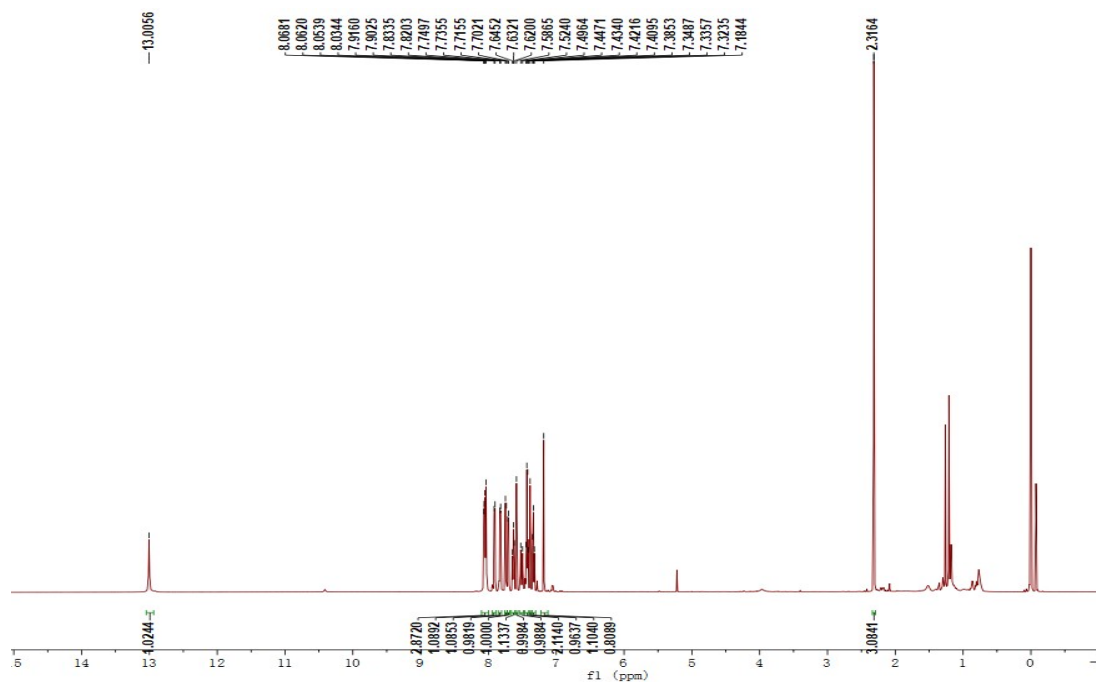

Figure S3. <sup>1</sup>H NMR spectra of PE-OH (CDCl<sub>3</sub>).

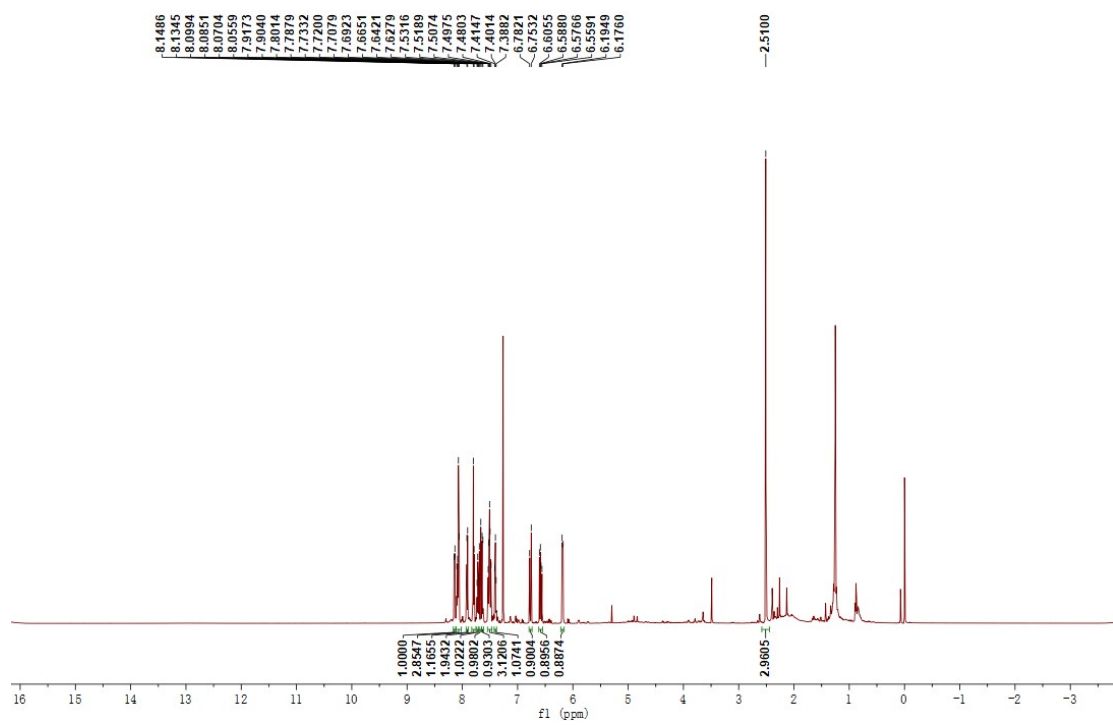

Figure S4. <sup>1</sup>H NMR spectra of PE-YW (CDCl<sub>3</sub>).

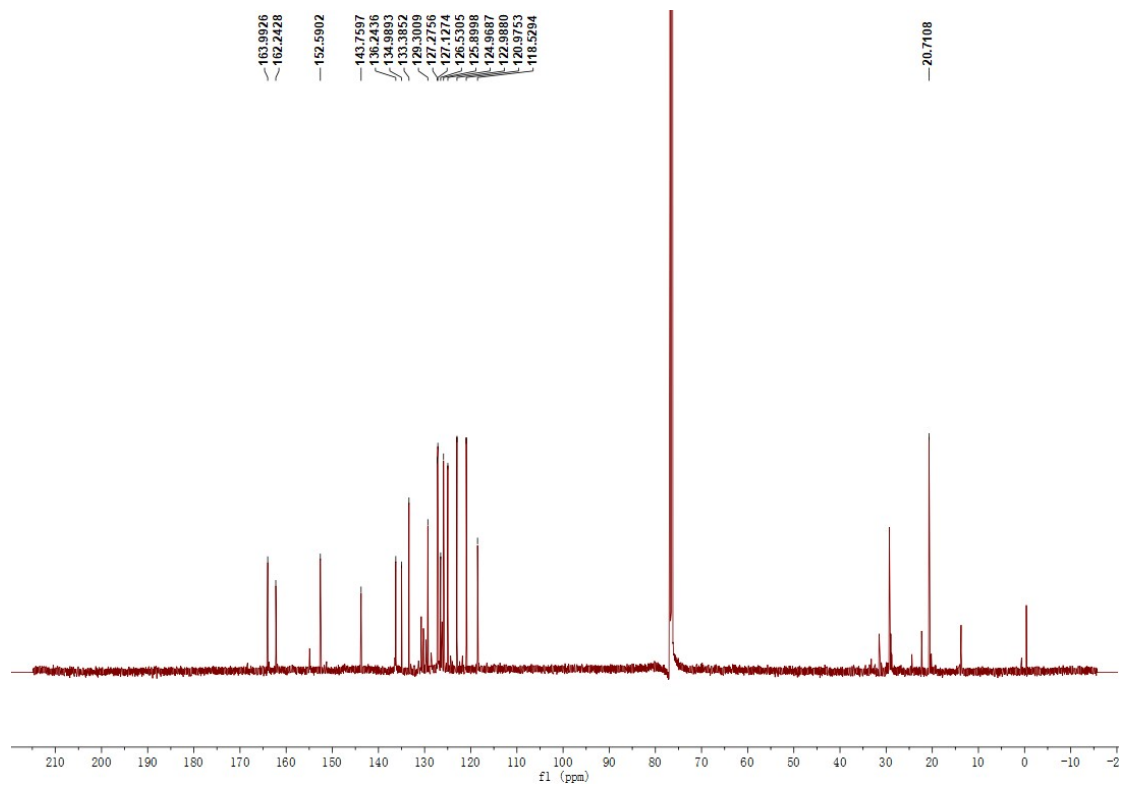

Figure S5.  $^{13}\text{C}$  NMR spectra of **PE-YW** ( $\text{CDCl}_3$ ).

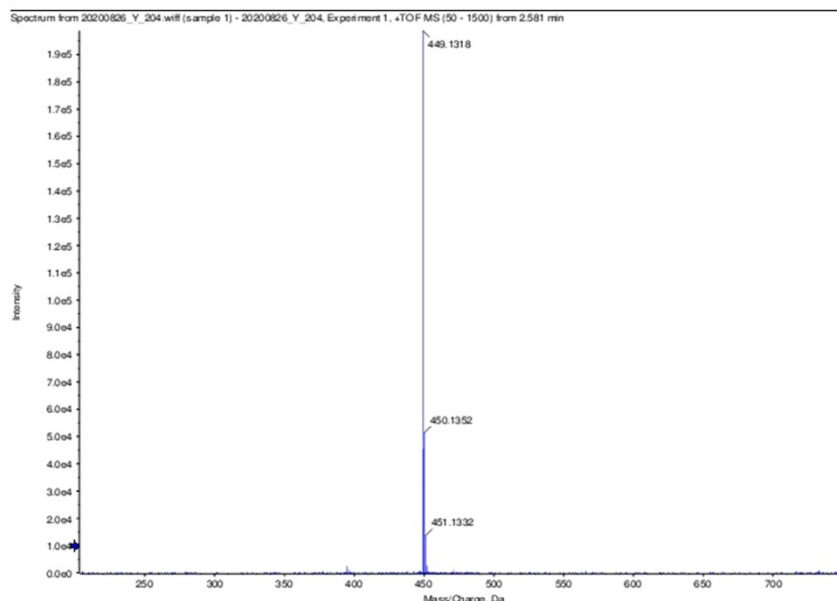

Figure S6. TOF-MS of **PE-YW** calculated for TOF-MS for  $\text{C}_{28}\text{H}_{20}\text{N}_2\text{O}_2\text{S} [\text{M}]^+$ , 449.5; found, 449.1318

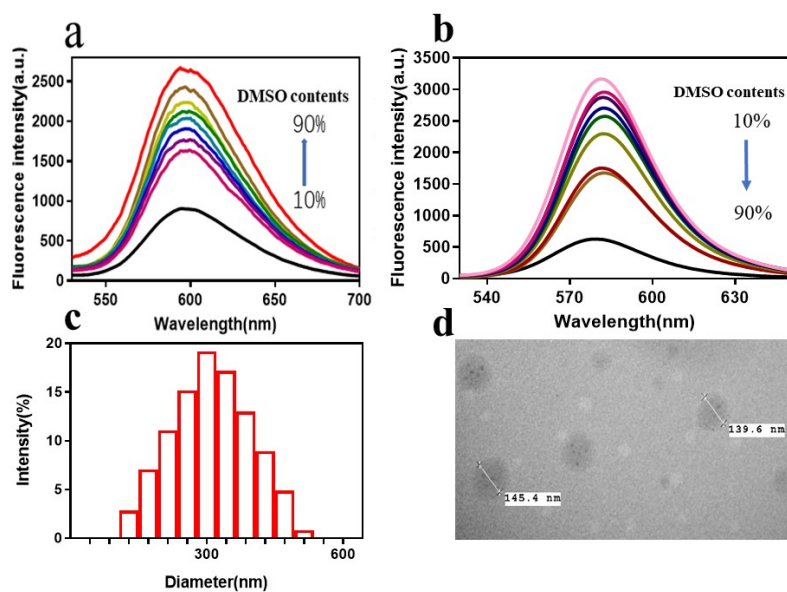

Figure S7. (a) Fluorescence spectra of **PE-OH** ( $10 \mu\text{M}$ ) in PBS buffer at pH 7.4 containing different concentrations of DMSO; (b) Fluorescence spectra of Rhodamine B ( $10 \mu\text{M}$ ) in PBS buffer at pH 7.4 containing different concentrations of DMSO; (c) the results of DLS; (d) the images of TEM.

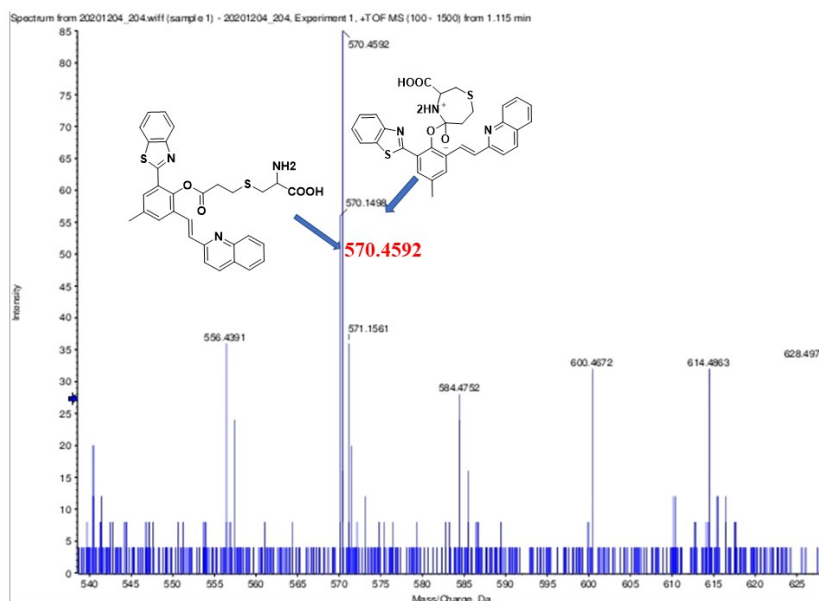

Figure S8. TOF-MS of **PE-YW-Cys-1** and **PE-YW-Cys-2** after **PE-YW** treatment with Cys.

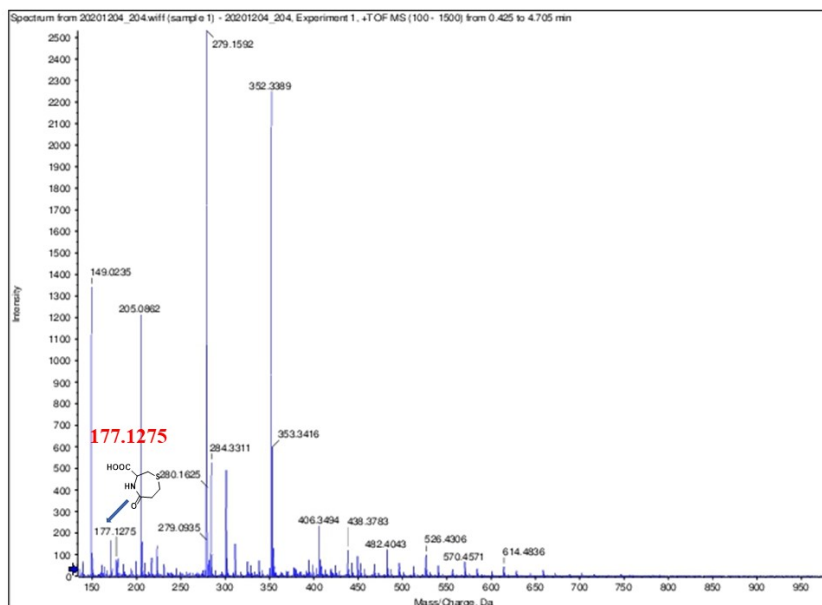

Figure S9. TOF-MS of **Cys-3** after **PE-YW** treatment with **Cys**.

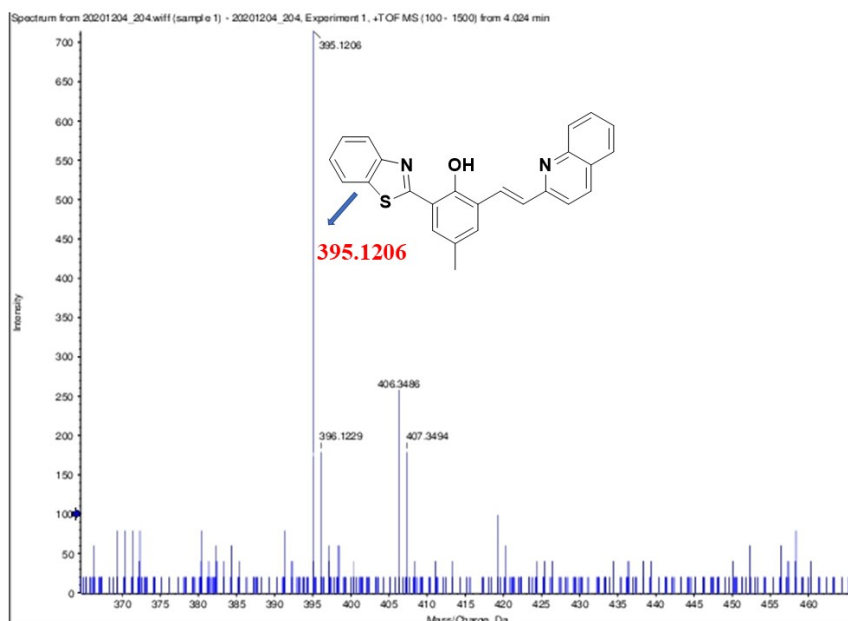

Figure S10. TOF-MS of **PE-OH** after **PE-YW** treatment with **Cys**

**Table.1** The comparison of reported work with this work

| Probe                                                                               | AIE/ACQ<br>Q | Ex/Em (nm)                                                                                                  | $\delta$ | LOD                                 | Time        | Application                      | ref |
|-------------------------------------------------------------------------------------|--------------|-------------------------------------------------------------------------------------------------------------|----------|-------------------------------------|-------------|----------------------------------|-----|
| 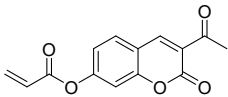   | ACQ          | $\lambda_{ex}=420$ nm;<br>$\lambda_{em}=456$ nm                                                             | 0.841    | 0.657<br>$\mu$ M                    | 40<br>min   | in buffer<br>and living<br>cells | 1   |
|    | ACQ          | $\lambda_{ex}=413$ nm;<br>$\lambda_{em}=450$ nm                                                             | /        | 80<br>nM                            | 20<br>min   | in buffer<br>and living<br>cells | 2   |
|    | ACQ          | $\lambda_{ex}=430$ nm;<br>$\lambda_{em}=560/460$<br>nm                                                      | 0.0235   | 5.08<br>$\mu$ M                     | 40<br>min   | in buffer<br>and living<br>cells | 3   |
|    | ACQ          | $\lambda_{ex}=574$ nm,<br>$\lambda_{em}=675$ nm                                                             | 0.031    | 0.2<br>$\mu$ M                      | 10<br>min   | in buffer<br>and living<br>cells | 4   |
|  | ACQ          | $\lambda_{ex}=450$ nm,<br>$\lambda_{em}=650/525$<br>nm                                                      | /        | 0.67<br>$\mu$ M,<br>0.76<br>$\mu$ M | 10<br>min   | in buffer<br>and living<br>cells | 5   |
|  | ACQ          | $\lambda_{ex}=500$ nm,<br>$\lambda_{em}=539/644$<br>nm                                                      | 0.84     | 46.7<br>nM                          | 30<br>min   | in buffer<br>and living<br>cells | 6   |
|  | ACQ          | $\lambda_{ex}=480$ nm,<br>$\lambda_{em}=517$ nm                                                             | /        | 0.05<br>$\mu$ M                     | < 5<br>min  | in buffer<br>and living<br>cells | 7   |
|  | ACQ          | $\lambda_{ex}=391$ nm,<br>$\lambda_{em}=559$ nm                                                             | /        | 0.12<br>$\mu$ M                     | < 10<br>min | in buffer<br>and living<br>cells | 8   |
|  | ACQ          | $\lambda_{ex}=538$ nm,<br>$\lambda_{em}=567$ nm                                                             | /        | 39.2<br>nM                          | 14<br>min   | in buffer<br>and living<br>cells | 9   |
|  | ACQ          | $\lambda_{ex}=450$ nm,<br>$\lambda_{em}=540$ nm;<br>$\lambda_{ex}=332$ nm,<br>$\lambda_{em}=540/472$<br>nm; | 0.020    | 0.084<br>$\mu$ M                    | 10<br>min   | in buffer<br>and living<br>cells | 10  |

|                                                                                     |     |                                                                             |       |                       |           |                                                             |    |
|-------------------------------------------------------------------------------------|-----|-----------------------------------------------------------------------------|-------|-----------------------|-----------|-------------------------------------------------------------|----|
| 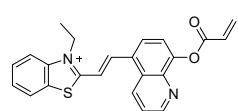   | ACQ | $\lambda_{\text{ex}}=570\text{nm}$ ,<br>$\lambda_{\text{em}}=591\text{ nm}$ | /     | 8.5<br>nM             | 100 s     | in buffer<br>and living<br>cells                            | 11 |
|    | ACQ | $\lambda_{\text{ex}}=420\text{nm}$ ,<br>$\lambda_{\text{em}}=568\text{ nm}$ | /     | 4.06<br>nM            | 5 min     | in buffer<br>and living<br>cells and<br>living<br>zebrafish | 12 |
|    | ACQ | $\lambda_{\text{ex}}=417\text{nm}$ ,<br>$\lambda_{\text{em}}=550\text{ nm}$ | 0.025 | 0.2<br>$\mu\text{M}$  | 5 min     | in buffer<br>and living<br>cells                            | 13 |
|    | ACQ | $\lambda_{\text{ex}}=333\text{nm}$ ,<br>$\lambda_{\text{em}}=446\text{ nm}$ | 0.025 | 0.8<br>$\mu\text{M}$  | 30<br>min | in buffer<br>and living<br>cells                            | 14 |
|    | ACQ | $\lambda_{\text{ex}}=397\text{nm}$ ,<br>$\lambda_{\text{em}}=607\text{ nm}$ | /     | 0.12<br>$\mu\text{M}$ | 80<br>min | in buffer<br>and living<br>cells                            | 15 |
|  | ACQ | $\lambda_{\text{ex}}=340\text{nm}$ ,<br>$\lambda_{\text{em}}=475\text{nm}$  | 0.254 | 0.07<br>$\mu\text{M}$ | 10<br>min | in buffer<br>and living<br>cells                            | 16 |
|  | ACQ | $\lambda_{\text{ex}}=360\text{nm}$ ,<br>$\lambda_{\text{em}}=465\text{nm}$  | /     | 0.64<br>$\mu\text{M}$ | 10<br>min | in buffer<br>and living<br>cells                            | 17 |
|  | ACQ | $\lambda_{\text{ex}}=360\text{nm}$ ,<br>$\lambda_{\text{em}}=520\text{nm}$  | /     | 0.1<br>$\mu\text{M}$  | 5<br>min  | in buffer<br>and living<br>cells                            | 18 |
|  | ACQ | $\lambda_{\text{ex}}=368\text{nm}$ ,<br>$\lambda_{\text{em}}=585\text{nm}$  | /     | 5.4<br>nM             | 20<br>min | in buffer<br>and living<br>cells                            | 19 |
|  | ACQ | $\lambda_{\text{ex}}=580\text{nm}$ ,<br>$\lambda_{\text{em}}=620\text{nm}$  | /     | 0.24<br>$\mu\text{M}$ | 60<br>min | in buffer<br>and living<br>cells                            | 20 |
|  | ACQ | $\lambda_{\text{ex}}=480\text{nm}$ ,<br>$\lambda_{\text{em}}=650\text{nm}$  | /     | 12.4<br>nM            | 5<br>min  | in buffer<br>and living<br>cells                            | 21 |

|                                                                                     |     |                                                                                |      |                        |            |                                         |    |
|-------------------------------------------------------------------------------------|-----|--------------------------------------------------------------------------------|------|------------------------|------------|-----------------------------------------|----|
| 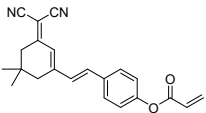   | ACQ | $\lambda_{\text{ex}}=557\text{nm}$ ,<br>$\lambda_{\text{em}}=673\text{nm}$     | /    | 0.16<br>$\mu\text{M}$  | /          | in buffer<br>and living<br>cells        | 22 |
|    | ACQ | $\lambda_{\text{ex}}=600\text{nm}$ ,<br>$\lambda_{\text{em}}=760\text{nm}$     | /    | 48<br>nM               | 5<br>min   | in buffer,<br>living cells<br>and mouse | 23 |
|    | ACQ | $\lambda_{\text{ex}}=410\text{nm}$ ,<br>$\lambda_{\text{em}}=506\text{nm}$     | /    | 0.39<br>$\mu\text{M}$  | 12<br>min  | in buffer<br>and living<br>cells        | 24 |
|    | ACQ | $\lambda_{\text{ex}}=400\text{nm}$ ,<br>$\lambda_{\text{em}}=525\text{nm}$     | /    | 14.8<br>nM             | 40<br>min  | in buffer<br>and living<br>cells        | 25 |
|    | ACQ | $\lambda_{\text{ex}}=380\text{nm}$ ,<br>$\lambda_{\text{em}}=545\text{nm}$     | /    | 13<br>nM               | /          | in buffer<br>and living<br>cells        | 26 |
|   | ACQ | $\lambda_{\text{ex}}=425\text{nm}$ ,<br>$\lambda_{\text{em}}=495/620\text{nm}$ | /    | 91<br>nM               | 10<br>min  | in buffer<br>and living<br>cells        | 27 |
|  | ACQ | $\lambda_{\text{ex}}=470\text{nm}$ ,<br>$\lambda_{\text{em}}=565\text{nm}$     | /    | 0.158<br>$\mu\text{M}$ | 90<br>min  | in buffer<br>and living<br>cells        | 28 |
|  | ACQ | $\lambda_{\text{ex}}=493\text{nm}$ ,<br>$\lambda_{\text{em}}=620\text{nm}$     | 0.3  | 18.7<br>$\mu\text{M}$  | 30<br>min  | in buffer<br>and living<br>cells        | 29 |
|  | ACQ | $\lambda_{\text{ex}}=400\text{nm}$ ,<br>$\lambda_{\text{em}}=530\text{nm}$     | /    | 0.5<br>$\mu\text{M}$   | 50<br>min  | in buffer<br>and living<br>cells        | 30 |
|  | ACQ | $\lambda_{\text{ex}}=510\text{nm}$ ,<br>$\lambda_{\text{em}}=552/664\text{nm}$ | /    | 84<br>nM               | 100<br>min | in buffer<br>and living<br>cells        | 31 |
|  | ACQ | $\lambda_{\text{ex}}=403\text{nm}$ ,<br>$\lambda_{\text{em}}=537/467\text{nm}$ | 0.54 | /                      | 120<br>min | in buffer<br>and living<br>cells        | 32 |
|  | ACQ | $\lambda_{\text{ex}}=360\text{nm}$ ,<br>$\lambda_{\text{em}}=383/518\text{nm}$ | 0.58 | 0.59<br>$\mu\text{M}$  | 30<br>min  | in buffer<br>and living<br>cells        | 33 |



|                                                                                   |     |                                                                                |     |                       |           |                                                       |                  |
|-----------------------------------------------------------------------------------|-----|--------------------------------------------------------------------------------|-----|-----------------------|-----------|-------------------------------------------------------|------------------|
| 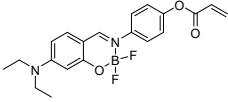 | ACQ | $\lambda_{\text{ex}}=405\text{nm}$ ,<br>$\lambda_{\text{em}}=461/474\text{nm}$ | /   | 95.1<br>nM            | 9<br>min  | in buffer<br>and living<br>cells                      | 34               |
|  | ACQ | $\lambda_{\text{ex}}=570\text{nm}$ ,<br>$\lambda_{\text{em}}=615\text{nm}$     | /   | 0.12<br>$\mu\text{M}$ | 30<br>min | in buffer<br>and living<br>cells                      | 35               |
|  | AIE | $\lambda_{\text{ex}}=341\text{nm}$ ,<br>$\lambda_{\text{em}}=490\text{nm}$     | /   | 0.18<br>$\mu\text{M}$ | 30<br>min | in buffer<br>and living<br>cells                      | 36               |
|  | AIE | $\lambda_{\text{ex}}=333\text{nm}$ ,<br>$\lambda_{\text{em}}=495\text{nm}$     | /   | 0.03<br>$\mu\text{M}$ | 15<br>min | in buffer<br>and living<br>cells                      | 37               |
|  | AIE | $\lambda_{\text{ex}}=478\text{nm}$ ,<br>$\lambda_{\text{em}}=576\text{nm}$     | 0.8 | 1.72<br>nM            | 20<br>min | in buffer,<br>living cells<br>and<br><i>C.elegans</i> | This<br>wor<br>k |

- X. Dai, Q. H. Wu, P. C. Wang, J. Tian, Y. Xu, S. Q. Wang, J. Y. Miao and B. X. Zhao, *Biosens Bioelectron*, 2014, **59**, 35-39.
- H. Qiao, Y. Meng, Y. Zhang, J. Sun, T. Wang, X. Zhang, F. Wang and Y. F. Kang, *Chem. Pap.*, 2018.
- X. Dai, T. Zhang, Y. Z. Liu, T. Yan, Y. Li, J. Y. Miao and B. X. Zhao, *Sens. Actuator B-Chem.*, 2015, **207**, 872-877.
- S. Feng, Y. Fang, W. Feng, Q. Xia and G. Feng, *Dyes Pigments*, 2017, **146**, 103-111.
- X. Jia, C. Niu, Y. He, Y. Sun and H. Liu, *J Fluoresc.*, 2018, **28**, 1059-1064.
- X. Yan, A. Ren, W. Xie and Z. Duan, *Anal Chim Acta*, 2019.
- Y. J. Fu, Z. Li, C. Y. Li, Y. F. Li, P. Wu and Z. H. Wen, *Dyes Pigments*, 2017, **139**, 381-387.
- Y. Yu, J. J. Yang, X. Xu, Y. Jiang and B. Wang, *Sens. Actuator B-Chem.*, 2017, **251**, 902-908.
- Y. Ji, F. Dai and B. Zhou, *Talanta*, 2019, **197**, 631-637.
- Z. Fu, X. Han, Y. Shao, J. Fang, Z. Zhang, Y. Wang and Y. Peng, *Anal. Chem.*, 2017, **89**, 1937-1944.
- H. Li, L. Jin, Y. Kan and B. Yin, *Sens. Actuator B-Chem.*, 2014, **196**, 546-554.
- Q. Wu, K. Wang, Z. Wang, Y. Sun and X. Yu, *Talanta*, 2018, **181**, 118-124.
- Y. Liu, D. Yu, S. Ding, Q. Xiao, J. Guo and G. Feng, *ACS Appl. Mater. Inter.*, 2014, **6**, 17543.
- H. Zhang, W. Feng and G. Feng, *Dyes Pigments*, 2017, **139**, 73-78.
- L. Tang, D. Xu, M. Tian and X. Yan, *J Lumin*, 2019, **208**, 502-508.
- A. Hs, B. Yha, Z. C. Yi, B. Sf, C. D. Yang, A. Xz and A. Wy, *Dyes Pigments*, 2019, **160**, 48-57.
- Yuan, Ding-Hao, Chen, Yi, Chak-Tong, Yin, Shuang-Feng, Hao-Ming, Liu and Wenping, *Sens. Actuator B-Chem.*, 2016, **233**, 173-179.

18. L. Wei, C. Wen, S. J. Liu and J. H. Jiang, *Methods Appl. Fluores.*, 2017, **5**, 014012.
19. X. Liu, H. H. Tian, L. Yang, Y. Su, M. Guo and X. Song, *Tetrahedron Letter.*, 2017,**58**, 3209-3213..
20. Y. L. Meng, Z. H. Xin, Y. J. Jia, Y. F. Kang, L. P. Ge, C. H. Zhang and M. Y. Dai, *Spectrochim. Acta. A.*, 2018, **202**, 301-304.
21. J. Zhou, C. Yu, Z. Li, P. Peng, D. Zhang, X. Han, H. Tang, Q. Wu, L. Li and W. Huang, *Anal Methods-UK*, 2019, **11**, 1312-1316.
22. Y. Yu, H. Xu, W. Zhang, Q. Han, B. Wang and Y. Jiang, *J. Photoch. Photobio. A*, 2017, **346**, 215-220.
23. Y. Qi, Y. Huang, B. Li, F. Zeng and S. Wu, *Anal. Chem.*, 2017, **90**, 1014-1020.
24. Manna, S.; Karmakar, P.; Ali, S. S.; Guria, U. N.; Samanta, S. K.; Sarkar, R.; Datta, P.; Mahapatra, A. K., *Anal Methods-UK*, 2019, **11**, 1199-1207..
25. L. Nie, B. Guo, C. Gao, S. Zhang, J. Jing and X. Zhang, *Rsc Adv.*, 2018, **8**, 37410-37416.
26. Y. Xiao, Y. Guo, R. Dang, X. Yan, P. Xu and P. Jiang, *RSC Adv.*, 2017, **7**, 21050-21053.
27. W. Peng, Q. Wang, J. Huang, L. Nan and Y. Gu, *Biosens Bioelectron.*, 2016, **92**, 583.
28. J. Guo, Z. Kuai, Z. Zhang, Q. Yang, Y. Shan and Y. Li, *Rsc Adv*, 2017, **7**, 18867-18873.
29. B. Shen and Y. Qian, *Dyes Pigments*, 2019, **166**, 350-356.
30. W. W. Ma, M. Y. Wang, D. Yin and X. Zhang, *Sens. Actuator B-Chem.*, 2017, **248**, 332-337.
31. Zhang, X.; Hang, Y.; Qu, W.; Yan, Y.; Zhao, P.; Hua, J., *Rsc Adv.*, 2016, **6**, 20014-20020.
32. Yang, B.; Xu, J.; Yuan, Z.-H.; Zheng, D.-J.; He, Z.-X.; Jiao, Q.-C.; Zhu, H.-L. *Talanta*, 2018, **189**, 629-635.
33. Qingqing, Mao, Liang, Wenlang, Stadler and J. Florian, *Talanta*, 2018, **186**, 110-118.
34. Zhu, D.; Yan, X.; Ren, A.; Cai, W.; Duan, Z.; Luo, Y., *Anal Methods-UK*, 2019, **11**, 2579-2584.
35. S. Jiao, X. He, L. Xu, P. Ma, C. Liu, Y. Huang, Y. Sun, X. Wang and D. Song, *Sens. Actuator B-Chem.*, 2019, **290**,47-52.
36. G. Jiang, X. Liu, Q. Chen, G. Zeng, Y. Wu, X. Dong, G. Zhang, Y. Li, X. Fan and J. Wang, *Sens. Actuator B-Chem.*, 2017, **252**, 712-716.
37. Huace, Sheng, Yonghong, Hu, Yi, Zhou, Shimin, Fan and Yang, *J. Photoch. Photobio. A.*, 2018, **364**, 750-757.
